# Supplementary material for: Serum Metabolomics Identifies Altered Bioenergetics, Signaling Cascades in Parallel with Exposome Markers in Crohn’s Disease
Source: PubMed Central journal article supplement (PMC6385106; doi:10.3390/molecules24030449), 2019-01-27
Supplement: molecules-24-00449-s001.pdf [file molecules-24-00449-s001.pdf]

## Supplementary Information

### Serum Metabolomics Identifies Altered Bioenergetics, Signaling Cascades in Parallel with Exosome Markers in Crohn's Disease

Yunjia Lai <sup>1</sup>, Jingchuan Xue <sup>1</sup>, Chih-Wei Liu <sup>1</sup>, Bei Gao <sup>2</sup>, Liang Chi <sup>1</sup>, Pengcheng Tu <sup>1</sup>, Kun Lu <sup>1</sup>, Hongyu Ru <sup>3\*</sup>

<sup>1</sup> Department of Environmental Sciences and Engineering, Gillings School of Global Public Health, CB #7431, University of North Carolina at Chapel Hill, NC 27599, United States; [lai7@live.unc.edu](mailto:lai7@live.unc.edu) (Y.L.); [xuejc@email.unc.edu](mailto:xuejc@email.unc.edu) (J.X.); [ericleah@email.unc.edu](mailto:ericleah@email.unc.edu) (C.L.); [liang16@live.unc.edu](mailto:liang16@live.unc.edu) (L.C.); [ptu@live.unc.edu](mailto:ptu@live.unc.edu) (P.T.); [kunlu@unc.edu](mailto:kunlu@unc.edu) (K.L.).

<sup>2</sup> NIH West Coast Metabolomics Center, University of California at Davis, CA 95616, United States; [beigao@ucdavis.edu](mailto:beigao@ucdavis.edu) (B.G.)

<sup>3</sup> Department of Population Health and Pathobiology, North Carolina State University, NC 27695, United States; [hru@ncsu.edu](mailto:hru@ncsu.edu) (H.R.)

\* Correspondence: [hru@ncsu.edu](mailto:hru@ncsu.edu); Tel.: +1 919-513-6915

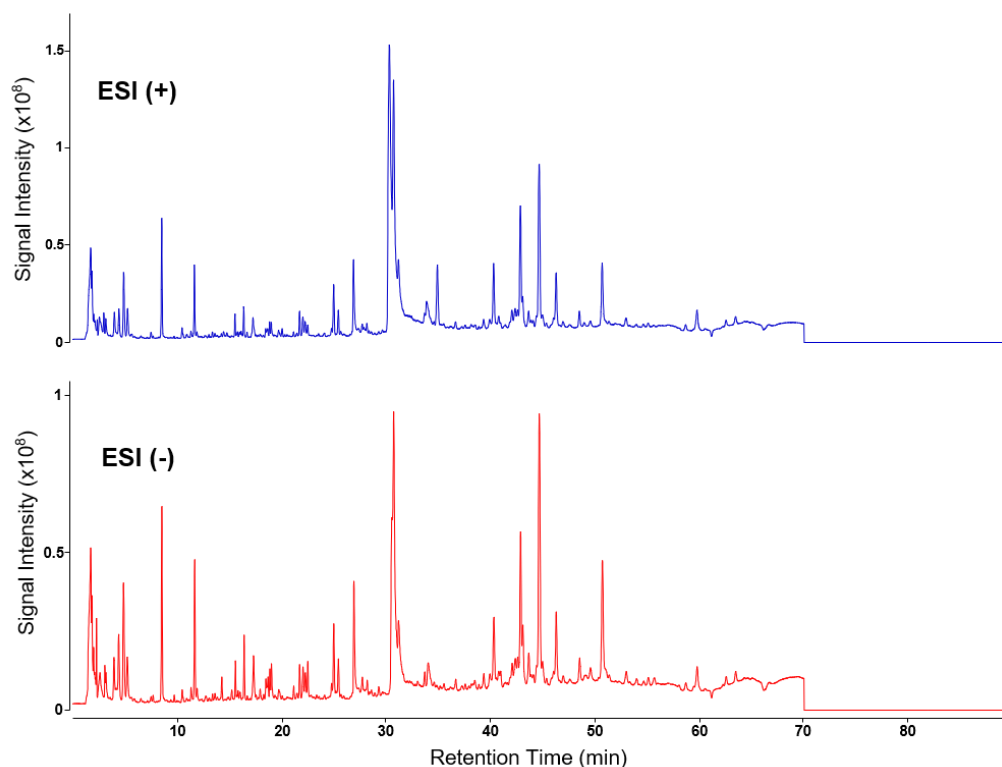

**Figure S1.** Representative total ion chromatograms for serum metabolites detected in ESI positive mode (upper panel) and ESI negative mode (lower panel) on LC-MS.

A

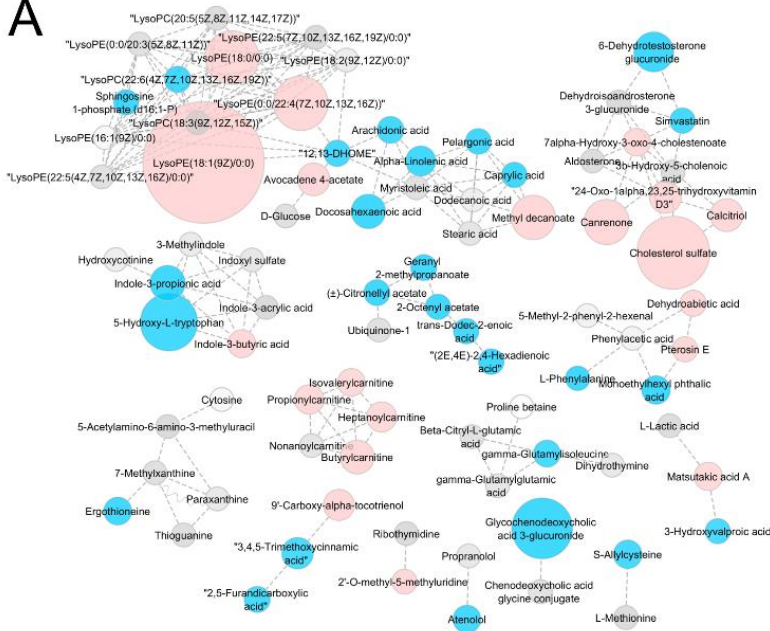

B

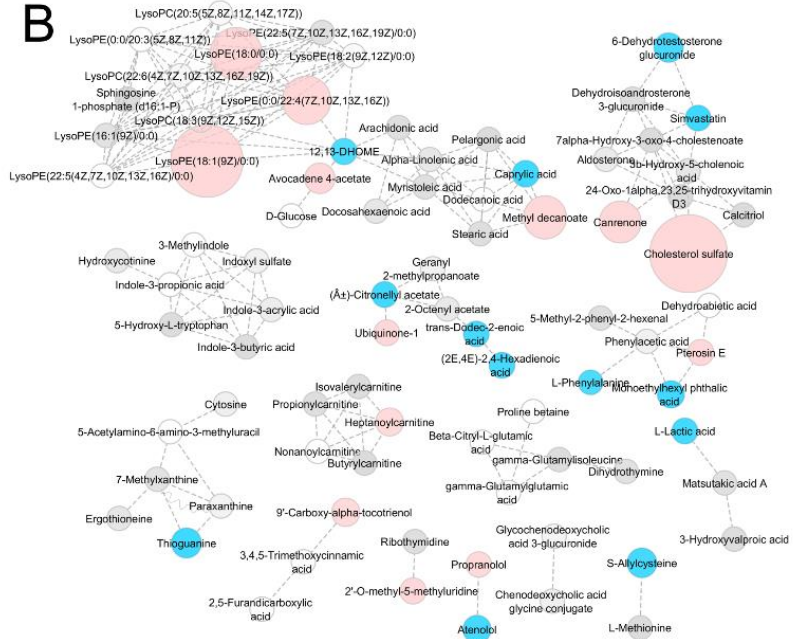

**Figure S2.** MetaMapp network visualization of metabolite-level changes in biochemical and/or chemical relationships, comparing inflammatory bowel disease versus control. Panel A gives metabolic changes for Crohn's active vs. Control, whereas Panel B Crohn's inactive vs. control. Here, one node represents one metabolite, with red and blue indicating upregulation and downregulation, respectively. Smaller  $p$ -values are indicated by lighter shades of color.

**Table S1.** List of compounds identified for the Crohn’s cohorts. <sup>1</sup> the Level of Annotation (1-4) for each feature as outlined in Minimum Reporting Standards for Chemical Analysis by the Metabolomics Standards Initiative (MSI) [1, 2]. <sup>2</sup> “FC [a/c]” stands for fold change of active Crohn’s as compared with Control; <sup>3</sup> “FC [a/i]” stands for fold change of active Crohn’s vs. inactive Crohn’s.

| Compound Name                                                                                                         | InChIKey                     | Level of Annotation <sup>1</sup> | FC [a/c] <sup>2</sup> | Change [a/c] | p-value [a/c] | FC [a/i] <sup>3</sup> | Change [a/i] | p-value [a/i] | ESI mode | Precursor Ion      | Precursor m/z | RT (min) |
|-----------------------------------------------------------------------------------------------------------------------|------------------------------|----------------------------------|-----------------------|--------------|---------------|-----------------------|--------------|---------------|----------|--------------------|---------------|----------|
| 2,3,5-Trimethoxy-6-(1E)-1-propenyl-2,5-cyclohexadiene-1,4-dione                                                       | RTBKABKNDSTIA-AATRIKPKSA-N   | 1                                | 2.01                  | Up           | 0.00000012    | 1.94                  | Up           | 0.00001349    | pos      | [M+H] <sup>+</sup> | 239.0917      | 35.38    |
| Monoethylhexyl phthalic acid                                                                                          | DJDSLVSQSLW-UHFFFAOYNA-N     | 1                                | 2.50                  | Down         | 0.00000238    | 1.89                  | Down         | 0.00002568    | pos      | [M+H] <sup>+</sup> | 279.1594      | 55.22    |
| Pteroin E                                                                                                             | UYEJDNVWNIKS-UHFFFAOYNA-N    | 2                                | 1.43                  | Up           | 0.00009140    | 1.47                  | Up           | 0.00015171    | pos      | [M+H] <sup>+</sup> | 233.1187      | 39.31    |
| Triisobutyl phosphate                                                                                                 | HRKAMJBPFPHCS-D-UHFFFAOYSA-N | 1                                | 2.34                  | Down         | 0.00023733    | 1.89                  | Down         | 0.00343767    | pos      | [M+H] <sup>+</sup> | 267.1718      | 50.21    |
| Phosphoric Acid Mono-[3-Amino-5-(5-Methyl-2,4-Dioxo-3,4-Dihydro-2h-Pyrimidin-1-Yl)-Tetrahydro-Furan-2-Ylmethyl] Ester | BQZMHQZLNBNJN-F-GJMOJQLCSA-N | 2                                | 2.91                  | Down         | 0.00053955    | 1.61                  | Down         | 0.04989865    | pos      | [M+H] <sup>+</sup> | 322.0794      | 3.95     |
| Butyrylcarnitine                                                                                                      | QWYFHHGCZUCM-BN-UHFFFAOYNA-N | 1                                | 4.19                  | Up           | 0.00084045    | 2.03                  | Up           | 0.05344752    | pos      | [M+H] <sup>+</sup> | 232.1540      | 35.07    |
| Sphingosine 1-phosphate (d16:1-P)                                                                                     | IQHNJQKWEMCXA-D-FOZJZALDNA-N | 2                                | 1.36                  | Down         | 0.00238964    | 1.23                  | Down         | 0.07546080    | pos      | [M+H] <sup>+</sup> | 352.2232      | 38.15    |
| (±)-Citronellyl acetate                                                                                               | JOZKFWLRHCDGJ-A-UHFFFAOYNA-N | 1                                | 1.74                  | Down         | 0.00316111    | 1.53                  | Down         | 0.00757509    | pos      | [M+H] <sup>+</sup> | 199.1683      | 52.16    |
| 24-Oxo-1α,23,25-trihydroxyvitamin D3                                                                                  | ARRIBDAUGOLZSJ-LTFRBZSVNA-N  | 2                                | 3.59                  | Up           | 0.00351258    | 1.79                  | Up           | 0.07694291    | pos      | [M+H] <sup>+</sup> | 447.3085      | 42.80    |
| 6-Dehydrotestosterone glucuronide                                                                                     | GCIVSXAHMONYL-O-HMAFJQTKSA-N | 1                                | 6.18                  | Down         | 0.00395415    | 2.61                  | Down         | 0.02871484    | pos      | [M+H] <sup>+</sup> | 463.2328      | 41.12    |
| 2'-O-methyl-5-methyluridine                                                                                           | YHRRPHCORALGK-Q-FDDDBJFASA-N | 2                                | 1.35                  | Up           | 0.00439937    | 1.48                  | Up           | 0.00004590    | pos      | [M+H] <sup>+</sup> | 273.1089      | 39.29    |
| Caprylic acid                                                                                                         | WWZKQHOCKIZLM-A-UHFFFAOYSA-N | 1                                | 1.53                  | Down         | 0.00516593    | 1.70                  | Down         | 0.00081482    | pos      | [M+H] <sup>+</sup> | 145.1223      | 39.82    |
| Glycochenodeoxycholic acid 3-glucuronide                                                                              | ABFZMYIIUREPLL-ZWDGQQLWSA-N  | 1                                | 12.95                 | Down         | 0.00526718    | 1.30                  | Down         | 0.47669904    | pos      | [M+H] <sup>+</sup> | 626.3526      | 35.05    |

|                                            |                                     |   |       |      |            |      |      |            |     |                    |          |       |
|--------------------------------------------|-------------------------------------|---|-------|------|------------|------|------|------------|-----|--------------------|----------|-------|
| L-Phenylalanine                            | COLNVLDHVKWLR<br>T-QMMMGOBSA-<br>N  | 1 | 1.21  | Down | 0.00531461 | 1.13 | Down | 0.04708596 | pos | [M+H] <sup>+</sup> | 166.0862 | 11.09 |
| Indole-3-propionic acid                    | GOLXRNDWAUTYK<br>T-UHFFFAOYSA-N     | 1 | 4.69  | Down | 0.00569155 | 1.19 | Down | 0.69102692 | pos | [M+H] <sup>+</sup> | 190.0852 | 30.81 |
| 9'-Carboxy- $\alpha$ -tocotrienol          | MEZYOZBFEXYIKB<br>-ASKDMKCJSA-N     | 1 | 3.29  | Up   | 0.00784716 | 2.17 | Up   | 0.04152933 | pos | [M+H] <sup>+</sup> | 387.2510 | 38.71 |
| Indole-3-butyric acid                      | JTEDVYBZBROSJT<br>-UHFFFAOYSA-N     | 1 | 2.33  | Up   | 0.00829724 | 2.31 | Up   | 0.08057940 | pos | [M+H] <sup>+</sup> | 204.1029 | 23.27 |
| (2E,4E)-2,4-Hexadienoic acid               | WSWCOQWTEOXD<br>QX-<br>MQQKCMAXSA-N | 1 | 1.63  | Down | 0.00868860 | 1.47 | Down | 0.02560559 | pos | [M+H] <sup>+</sup> | 113.0601 | 17.58 |
| Pelargonic acid                            | FBUKVWPVBMHYJ<br>Y-UHFFFAOYSA-N     | 1 | 1.63  | Down | 0.01023227 | 1.45 | Down | 0.06353545 | pos | [M+H] <sup>+</sup> | 159.1381 | 25.64 |
| 2-Octenyl acetate                          | MBRLTLPVMFRT<br>J-FPLPWBNSA-N       | 1 | 1.50  | Down | 0.01104562 | 1.23 | Down | 0.28585419 | pos | [M+H] <sup>+</sup> | 171.1380 | 32.32 |
| Ergothioneine                              | SSISHJTAXXQAX-<br>ZETCQYMNSA-N      | 1 | 2.31  | Down | 0.01200790 | 1.32 | Down | 0.24507362 | pos | [M+H] <sup>+</sup> | 230.0960 | 2.21  |
| $\alpha$ -Linolenic acid                   | DTOSIQBPPRVQH<br>S-PDBXOOCHSA-N     | 1 | 3.02  | Down | 0.01393572 | 1.49 | Down | 0.25963934 | pos | [M+H] <sup>+</sup> | 279.2310 | 61.00 |
| LSM-15135                                  | PJAYKLYFYLNPHZ-<br>KAIUQPJCNA-N     | 1 | 1.64  | Down | 0.01435329 | 1.09 | Down | 0.61822021 | pos | [M+H] <sup>+</sup> | 467.2613 | 46.11 |
| LysoPC(22:6(4Z,7Z,10Z,13Z,16Z,19Z)<br>)    | LSOWKZULVQWML<br>Y-APPDJCNMSA-N     | 1 | 1.81  | Down | 0.01453815 | 1.11 | Up   | 0.52934087 | pos | [M+H] <sup>+</sup> | 568.3380 | 47.24 |
| (3E,5Z)-Tetradecadienoate                  | YRUMHTHCEZRHT<br>N-XAZJVICWSA-M     | 2 | 1.42  | Down | 0.01655718 | 1.26 | Down | 0.03600126 | pos | [M+H] <sup>+</sup> | 225.1835 | 51.39 |
| Geranyl 2-methylpropanoate                 | OGJYXQFXLSCKTP<br>-LCYFTJDESA-N     | 1 | 1.70  | Down | 0.01870596 | 1.18 | Down | 0.43207215 | pos | [M+H] <sup>+</sup> | 225.1844 | 64.36 |
| Simvastatin                                | RYMZZMVNJRMUD<br>D-HGQWONQESA-<br>N | 1 | 1.45  | Down | 0.01904638 | 1.35 | Down | 0.00083845 | pos | [M+H] <sup>+</sup> | 419.2771 | 56.35 |
| Parthenolide                               | KTEXNACQROZXE<br>V-RXBUGHCGNA-N     | 2 | 2.69  | Down | 0.01972979 | 1.69 | Down | 0.17932579 | pos | [M+H] <sup>+</sup> | 249.1465 | 17.45 |
| 5-Hydroxy-L-tryptophan                     | LDCYZAJDBXYCG<br>N-UHFFFAOYNA-N     | 1 | 11.85 | Down | 0.02005146 | 3.63 | Down | 0.07577307 | pos | [M+H] <sup>+</sup> | 221.0933 | 7.05  |
| 7 $\alpha$ -Hydroxy-3-oxo-4-cholestenolate | SATGKQGFUDXGA<br>X-QLHYZZJLNA-N     | 1 | 2.15  | Up   | 0.02126665 | 1.50 | Up   | 0.06262454 | pos | [M+H] <sup>+</sup> | 431.3156 | 51.03 |

|                                      |                                     |   |      |      |            |      |      |            |     |                    |          |       |
|--------------------------------------|-------------------------------------|---|------|------|------------|------|------|------------|-----|--------------------|----------|-------|
| Arachidonic acid                     | YZXBAPSDXZZRG<br>B-DOFZRALJSA-N     | 1 | 2.05 | Down | 0.02137707 | 1.50 | Down | 0.12431059 | pos | [M+H] <sup>+</sup> | 305.2469 | 63.76 |
| Dehydroabiatic acid                  | NFWKVVWBFBA<br>OV-IPNZSQQUA-<br>N   | 1 | 1.68 | Up   | 0.02223098 | 1.01 | Down | 0.93759620 | pos | [M+H] <sup>+</sup> | 301.2179 | 26.60 |
| Calcitriol                           | GMRQFYUYWCNGI<br>N-NKMMMWOESA-<br>N | 1 | 3.91 | Up   | 0.02238014 | 1.59 | Up   | 0.05877359 | pos | [M+H] <sup>+</sup> | 417.3355 | 52.91 |
| Atenolol                             | METKIMKYRQLG<br>S-UHFFFAOYSA-N      | 1 | 2.34 | Down | 0.02318934 | 2.15 | Down | 0.01960119 | pos | [M+H] <sup>+</sup> | 267.1716 | 50.14 |
| 12,13-DHOME                          | CQSLTKIXAJTQGA-<br>FLIBITNWNA-N     | 1 | 1.76 | Down | 0.02513131 | 1.61 | Down | 0.04717503 | pos | [M+H] <sup>+</sup> | 315.2527 | 65.90 |
| <i>trans</i> -Dodec-2-enoic acid     | PAWGRNGPMLVJQ<br>H-ZHACJKMWSA-N     | 1 | 1.46 | Down | 0.02518177 | 1.38 | Down | 0.02369593 | pos | [M+H] <sup>+</sup> | 199.1688 | 59.53 |
| Docosahexaenoic acid                 | MBMBGCFOFBJS<br>T-KUBAVDMBSA-N      | 1 | 4.17 | Down | 0.02536038 | 1.67 | Down | 0.23455029 | pos | [M+H] <sup>+</sup> | 329.2477 | 62.97 |
| Propionylcarnitine                   | UFAHZIUFPNSHSL-<br>UHFFFAOYNA-N     | 1 | 2.80 | Up   | 0.02630172 | 1.86 | Up   | 0.10660293 | pos | [M+H] <sup>+</sup> | 218.1396 | 32.66 |
| S-Allylcysteine                      | ZFAHNWWNDFHP<br>OH-UHFFFAOYNA-<br>N | 1 | 2.52 | Down | 0.02883093 | 2.66 | Down | 0.02462844 | pos | [M+H] <sup>+</sup> | 162.0582 | 6.71  |
| gamma-Glutamylisoleucine             | SNCKGJWJABDZHI<br>-WHOSYVTDNA-N     | 1 | 1.96 | Down | 0.03257083 | 1.67 | Down | 0.08462893 | pos | [M+H] <sup>+</sup> | 261.1445 | 15.87 |
| 2,5-Furandicarboxylic acid           | CHTHALBTIRVDBM<br>-UHFFFAOYSA-N     | 2 | 1.65 | Down | 0.03372017 | 1.06 | Down | 0.72365954 | pos | [M+H] <sup>+</sup> | 157.0142 | 4.33  |
| Heptanoylcarnitine                   | VDPCTFWULDKHH<br>T-UHFFFAOYNA-N     | 2 | 3.01 | Up   | 0.03514665 | 2.13 | Up   | 0.04767880 | pos | [M+H] <sup>+</sup> | 274.1996 | 47.00 |
| Matsutakic acid A                    | VSKXYKGCLVJSE<br>W-UHFFFAOYNA-N     | 1 | 2.43 | Up   | 0.03516141 | 1.65 | Up   | 0.15544906 | pos | [M+H] <sup>+</sup> | 201.1122 | 32.59 |
| Isovalerylcarnitine                  | IGQBPDJNUXPEMT<br>-UHFFFAOYNA-N     | 1 | 2.24 | Up   | 0.03606865 | 1.61 | Up   | 0.09112958 | pos | [M+H] <sup>+</sup> | 246.1685 | 38.90 |
| 3-Hydroxyvalproic acid               | LLPFTSMZBSRZDV<br>-UHFFFAOYNA-N     | 1 | 1.39 | Down | 0.04358658 | 1.41 | Down | 0.09670605 | pos | [M+H] <sup>+</sup> | 161.1161 | 13.96 |
| 3,4,5-Trimethoxycinnamic acid        | YTFVRYKNXDADBI<br>-SNAWJCMRSA-N     | 1 | 3.47 | Down | 0.04541668 | 1.10 | Up   | 0.84296594 | pos | [M+H] <sup>+</sup> | 239.0914 | 24.15 |
| 5-Acetylamino-6-amino-3-methyluracil | POQOTWQIYYNXA<br>T-UHFFFAOYSA-N     | 2 | 1.91 | Up   | 0.05314924 | 1.18 | Down | 0.68391172 | pos | [M+H] <sup>+</sup> | 199.0808 | 7.63  |

|                                      |                                |   |      |      |            |      |      |            |     |                    |          |       |
|--------------------------------------|--------------------------------|---|------|------|------------|------|------|------------|-----|--------------------|----------|-------|
| Indole-3-acrylic acid                | PLVPPCLCLBIEYEA-WAYWQWQTSA-N   | 1 | 1.22 | Down | 0.05771250 | 1.09 | Down | 0.36774566 | pos | [M+H] <sup>+</sup> | 188.0698 | 15.58 |
| Ribothymidine                        | DWRXFEITVBNRMK-JXOAFINSNA-N    | 1 | 1.75 | Down | 0.06020041 | 1.62 | Down | 0.10530982 | pos | [M+H] <sup>+</sup> | 259.0942 | 4.23  |
| LysoPE(22:5(7Z,10Z,13Z,16Z,19Z)/0:0) | OSRWIBSZJTWIKASCFYABBUSANA-N   | 2 | 1.74 | Up   | 0.06105994 | 1.40 | Up   | 0.16189187 | pos | [M+H] <sup>+</sup> | 528.3073 | 49.68 |
| Dehydroisoandrosterone 3-glucuronide | GLONBVCUAVPJFV-CLIRWHJISANA-N  | 1 | 1.86 | Up   | 0.06292079 | 1.71 | Up   | 0.12284762 | pos | [M+H] <sup>+</sup> | 465.2484 | 56.10 |
| L-Methionine                         | FFEARJCKVFRZRR-BYPYZUCNSANA-N  | 1 | 1.47 | Down | 0.06777699 | 1.43 | Down | 0.06416236 | pos | [M+H] <sup>+</sup> | 150.0577 | 3.30  |
| LysoPC(18:3(9Z,12Z,15Z))             | WKQNRCKYKYCKESD-YVHLTTHBSANA-N | 1 | 1.49 | Up   | 0.07746452 | 1.08 | Down | 0.72753743 | pos | [M+H] <sup>+</sup> | 518.3259 | 44.74 |
| Aldosterone                          | PQSUYGKTWSAVDQ-SRPWZAMTSANA-N  | 1 | 1.39 | Down | 0.08182447 | 1.15 | Up   | 0.32676505 | pos | [M+H] <sup>+</sup> | 361.2023 | 30.55 |
| 3b-Hydroxy-5-cholenoic acid          | HIAJCGFYHIANNA-HPIXXDBXNANA-N  | 1 | 4.22 | Down | 0.08876483 | 2.71 | Up   | 0.24520638 | pos | [M+H] <sup>+</sup> | 375.2873 | 45.55 |
| L-Lactic acid                        | JVTAAEKCFNVCJR-ROZJLTNANA-N    | 1 | 1.35 | Down | 0.09066944 | 1.48 | Down | 0.01574859 | pos | [M+H] <sup>+</sup> | 91.0397  | 3.35  |
| LysoPC(20:5(5Z,8Z,11Z,14Z,17Z))      | PDIGSOAQOQXRDU-WJPZTBRDSANA-N  | 1 | 1.72 | Down | 0.09558370 | 1.19 | Down | 0.57586369 | pos | [M+H] <sup>+</sup> | 542.3237 | 44.46 |
| Ulipristal acetate                   | OOLAFOLCSJHRE-ZHAKMVSLSANANA-N | 2 | 1.62 | Up   | 0.10617879 | 1.12 | Down | 0.56839007 | pos | [M+H] <sup>+</sup> | 476.2826 | 44.15 |
| Thioguanine                          | WYWHKKSPHMUBEB-UHFFFAOYSANA-N  | 2 | 1.38 | Down | 0.10676364 | 2.80 | Down | 0.00034464 | pos | [M+H] <sup>+</sup> | 168.0346 | 30.30 |
| LysoPC(18:3(6Z,9Z,12Z))              | MRTUWVDDQVMUCR-ACHCNROVSANA-N  | 1 | 1.19 | Down | 0.11792120 | 1.07 | Down | 0.13069027 | pos | [M+H] <sup>+</sup> | 518.3233 | 48.83 |
| D-Glucose                            | WQZGKKKJJIJFFOK-GASJEMHNSANA-N | 1 | 1.47 | Up   | 0.14023224 | 1.16 | Down | 0.66628804 | pos | [M+H] <sup>+</sup> | 181.0712 | 14.18 |
| 7-Methylxanthine                     | PFWLFWPASULGAN-UHFFFAOYSANA-N  | 1 | 2.53 | Down | 0.14103080 | 2.40 | Down | 0.18589556 | pos | [M+H] <sup>+</sup> | 167.0562 | 12.98 |
| LysoPE(0:0/20:3(5Z,8Z,11Z))          | FJDVENKXPUIXRG-WMTBOZPISANA-N  | 1 | 1.58 | Up   | 0.14721517 | 1.01 | Down | 0.97617820 | pos | [M+H] <sup>+</sup> | 504.3060 | 48.74 |
| Myristoleic acid                     | YWWVWXASSLXJHU-WAYWQWQTSA-N    | 1 | 1.65 | Up   | 0.15060851 | 2.36 | Up   | 0.12243280 | pos | [M+H] <sup>+</sup> | 227.1994 | 45.40 |

|                                         |                                     |   |       |      |            |      |      |            |     |                    |          |       |
|-----------------------------------------|-------------------------------------|---|-------|------|------------|------|------|------------|-----|--------------------|----------|-------|
| Ubiquinone-1                            | SOECUQMRSRVZQ<br>Q-UHFFFAOYSA-N     | 1 | 1.22  | Up   | 0.15804160 | 1.36 | Up   | 0.00035947 | pos | [M+H] <sup>+</sup> | 251.1263 | 45.40 |
| LysoPE(22:5(4Z,7Z,10Z,13Z,16Z)/0:0)     | GUWNUQBHHWXH<br>BE-GOGKNFEWSA-<br>N | 2 | 1.50  | Up   | 0.15936736 | 1.09 | Up   | 0.75055930 | pos | [M+H] <sup>+</sup> | 528.3086 | 48.30 |
| β-Citryl-L-glutamic acid                | GAQNUGISBQJMK<br>O-UHFFFAOYNA-N     | 2 | 1.24  | Down | 0.16591115 | 1.03 | Down | 0.83778341 | pos | [M+H] <sup>+</sup> | 322.0766 | 6.82  |
| 5'-Methylthioadenosine                  | WUUGFSXJNOTRM<br>R-IOSLPCCCSA-N     | 1 | 1.18  | Up   | 0.16961838 | 1.20 | Up   | 0.15108435 | pos | [M+H] <sup>+</sup> | 298.0985 | 15.21 |
| Chenodeoxycholic acid glycine conjugate | GHCZAUBVMUEKK<br>P-YDVLHWCRNA-N     | 1 | 26.56 | Down | 0.19209194 | 2.61 | Down | 0.40614603 | pos | [M+H] <sup>+</sup> | 450.3220 | 39.48 |
| Nonanoylcarnitine                       | MPSPNFAQQMFL<br>K-UHFFFAOYNA-N      | 1 | 1.51  | Up   | 0.22273708 | 1.14 | Down | 0.74371959 | pos | [M+H] <sup>+</sup> | 302.2303 | 28.80 |
| Stearic acid                            | QIQXTHQIDYTFRH-<br>UHFFFAOYSA-N     | 1 | 1.36  | Up   | 0.22840365 | 1.41 | Up   | 0.10401974 | pos | [M+H] <sup>+</sup> | 285.2781 | 70.69 |
| D,L-Cyclohexanephosphinothricin         | ZAIBDODFHKWMIG<br>-UHFFFAOYNA-M     | 2 | 1.19  | Up   | 0.25278998 | 1.36 | Up   | 0.07149174 | pos | [M+H] <sup>+</sup> | 222.0894 | 49.63 |
| γ-Glutamylglutamic acid                 | OWQDWQKWSLFF<br>FR-IOMOGOHMNA-<br>N | 1 | 1.53  | Down | 0.25986788 | 1.11 | Down | 0.82237316 | pos | [M+H] <sup>+</sup> | 277.1021 | 2.88  |
| Indoxyl sulfate                         | BXFFHSIDQOFMLE<br>-UHFFFAOYSA-N     | 2 | 1.61  | Down | 0.26222779 | 1.45 | Up   | 0.43719360 | pos | [M+H] <sup>+</sup> | 214.0155 | 22.16 |
| Propranolol                             | AQHHDHLHXYJ<br>D-UHFFFAOYSA-N       | 2 | 1.23  | Up   | 0.27184370 | 1.32 | Up   | 0.02484055 | pos | [M+H] <sup>+</sup> | 260.1664 | 46.13 |
| Dihydrothymine                          | NBAKTGXDIHVZOO<br>-UHFFFAOYNA-N     | 1 | 1.44  | Up   | 0.27809666 | 1.66 | Down | 0.15573618 | pos | [M+H] <sup>+</sup> | 129.0659 | 1.95  |
| Methyl cinnamate                        | CCRCUPLGCSFED<br>V-FPLPWBNSA-N      | 1 | 1.18  | Up   | 0.27841737 | 1.29 | Up   | 0.00253455 | pos | [M+H] <sup>+</sup> | 163.0756 | 42.43 |
| Paraxanthine                            | QUNWUDVFRNGT<br>CO-UHFFFAOYSA-<br>N | 1 | 1.87  | Down | 0.28646028 | 1.60 | Down | 0.46275957 | pos | [M+H] <sup>+</sup> | 181.0718 | 15.74 |
| LysoPC(20:4(8Z,11Z,14Z,17Z))            | GOMVPVRDBLLHQ<br>C-VEJNOCSESA-N     | 1 | 1.19  | Down | 0.30754597 | 1.17 | Down | 0.31391066 | pos | [M+H] <sup>+</sup> | 544.3402 | 46.31 |
| Corallopyronin A                        | FPBHSTHTCPCNB<br>S-KMCNCHRSNA-N     | 2 | 1.57  | Down | 0.31903603 | 1.22 | Up   | 0.51337778 | pos | [M+H] <sup>+</sup> | 528.2994 | 47.01 |
| 2-Aminoheptanoate                       | RDFMDVXONNIGB<br>C-UHFFFAOYNA-N     | 1 | 1.12  | Down | 0.37384841 | 1.03 | Up   | 0.80661879 | pos | [M+H] <sup>+</sup> | 146.1176 | 2.09  |

|                                      |                                  |   |      |      |            |       |      |            |     |                    |          |       |
|--------------------------------------|----------------------------------|---|------|------|------------|-------|------|------------|-----|--------------------|----------|-------|
| LysoPE(18:2(9Z,12Z)/0:0)             | DBHKHNGBVGWQJ<br>E-USWSLJGRSA-N  | 1 | 1.28 | Up   | 0.37511829 | 1.12  | Down | 0.63061274 | pos | [M+H] <sup>+</sup> | 478.2921 | 46.67 |
| Hydroxycotinine                      | XOKCJXZZNAUIQN<br>-IENPIDJESA-N  | 1 | 2.05 | Up   | 0.37944805 | 13.73 | Down | 0.30149033 | pos | [M+H] <sup>+</sup> | 193.0981 | 2.98  |
| Senecioic acid                       | YYPNJNDODFVZLE<br>-UHFFFAOYSA-N  | 1 | 1.16 | Down | 0.39043044 | 1.21  | Down | 0.21185416 | pos | [M+H] <sup>+</sup> | 101.0598 | 11.53 |
| (9S,10S)-9,10-dihydroxyoctadecanoate | VACHUYIREGFMS<br>P-RXQGYGPJNA-N  | 1 | 1.13 | Down | 0.41123009 | 1.15  | Down | 0.09478146 | pos | [M+H] <sup>+</sup> | 317.2684 | 60.31 |
| LysoPC(20:4(5Z,8Z,11Z,14Z))          | LAXQYRRMGEGE<br>OH-JXRLJXCWSA-N  | 1 | 1.17 | Down | 0.42149622 | 1.16  | Down | 0.46194975 | pos | [M+H] <sup>+</sup> | 544.3406 | 46.39 |
| Phenylacetic acid                    | WLJVXDMOQGP<br>HL-UHFFFAOYSA-N   | 1 | 2.02 | Up   | 0.46162512 | 1.34  | Up   | 0.43715042 | pos | [M+H] <sup>+</sup> | 137.0603 | 30.58 |
| 3-Hydroxysuberic acid                | ARJZZFJXSNJKGR-<br>UHFFFAOYNA-N  | 2 | 1.13 | Down | 0.46183185 | 1.19  | Down | 0.34598512 | pos | [M+H] <sup>+</sup> | 191.0901 | 17.66 |
| 5-Methyl-2-phenyl-2-hexenal          | YURDCJXYOLERL<br>O-LCYFTJDESA-N  | 2 | 1.23 | Down | 0.46522402 | 1.48  | Down | 0.11108539 | pos | [M+H] <sup>+</sup> | 189.1260 | 8.44  |
| cis-Aconitic acid                    | GTZCVFVGUGFEM<br>E-IWQZZHSRSA-N  | 1 | 1.14 | Down | 0.51428003 | 1.37  | Up   | 0.11241819 | pos | [M+H] <sup>+</sup> | 175.0234 | 4.92  |
| LysoPE(16:1(9Z)/0:0)                 | DSOWUEHXZJUNI<br>D-WHXUGTBJSA-N  | 1 | 1.25 | Up   | 0.54487432 | 1.74  | Down | 0.17590534 | pos | [M+H] <sup>+</sup> | 452.2778 | 44.78 |
| Cytosine                             | OPTASPLRGRRNA<br>P-UHFFFAOYSA-N  | 2 | 1.36 | Up   | 0.54810195 | 1.56  | Down | 0.39410340 | pos | [M+H] <sup>+</sup> | 112.0495 | 6.21  |
| Persin                               | IBDVBUJEGRVQN<br>-NQLNTRKRDNA-N  | 1 | 1.16 | Up   | 0.57078057 | 1.31  | Up   | 0.39578507 | pos | [M+H] <sup>+</sup> | 381.2979 | 69.16 |
| Proline betaine                      | CMUNUTVVOOHQ<br>PW-LURJTMIESA-N  | 1 | 1.26 | Up   | 0.63922805 | 1.29  | Down | 0.68321720 | pos | [M+H] <sup>+</sup> | 144.1018 | 2.15  |
| 3-Hydroxydodecanedioic acid          | FYVQCLGZFXHEG<br>L-UHFFFAOYNA-N  | 1 | 1.09 | Up   | 0.64697586 | 1.11  | Up   | 0.60691447 | pos | [M+H] <sup>+</sup> | 247.1534 | 29.05 |
| D-Limonene                           | XMGQYMMWWDOXH<br>JM-SNVBAGLBSA-N | 1 | 1.09 | Up   | 0.68927767 | 1.40  | Up   | 0.09540662 | pos | [M+H] <sup>+</sup> | 137.1325 | 63.69 |
| Palmitic acid                        | IPCSVZSSVZVIGE-<br>UHFFFAOYSA-N  | 1 | 1.07 | Down | 0.73279017 | 1.08  | Up   | 0.64989658 | pos | [M+H] <sup>+</sup> | 257.2473 | 63.69 |
| Leucylproline                        | VTJUNIYRYIAIHF-<br>UHFFFAOYNA-N  | 1 | 1.06 | Up   | 0.73624653 | 1.03  | Down | 0.80241990 | pos | [M+H] <sup>+</sup> | 229.1546 | 3.48  |



|                                                       |                                     |   |       |      |            |      |      |            |     |                    |          |       |
|-------------------------------------------------------|-------------------------------------|---|-------|------|------------|------|------|------------|-----|--------------------|----------|-------|
| L-Valine                                              | KZSNJWFQEVHDM<br>F-SGAVLPGINA-N     | 1 | 1.03  | Down | 0.82807666 | 1.09 | Down | 0.59022497 | pos | [M+H] <sup>+</sup> | 118.0871 | 2.30  |
| MG(16:0/0:0/0:0)                                      | QHZLMUACJMDIAE<br>-SFHVURJKSA-N     | 1 | 1.05  | Down | 0.82849371 | 1.10 | Up   | 0.63294725 | pos | [M+H] <sup>+</sup> | 331.2841 | 63.69 |
| Cinnamic acid                                         | WBYWAXJHAXSJNI<br>-SREVVYHEPSA-N    | 1 | 1.01  | Down | 0.85359641 | 1.06 | Down | 0.22051079 | pos | [M+H] <sup>+</sup> | 149.0589 | 37.43 |
| Suberic acid                                          | TYFQFVWCCELRYA<br>O-UHFFFAOYSA-N    | 1 | 1.03  | Up   | 0.87277712 | 1.09 | Down | 0.55798882 | pos | [M+H] <sup>+</sup> | 175.0963 | 22.77 |
| Acetylisoniazid                                       | CVBGNAKQQUWB<br>QV-UHFFFAOYSA-<br>N | 2 | 1.09  | Down | 0.87761371 | 1.79 | Down | 0.30178412 | pos | [M+H] <sup>+</sup> | 180.0779 | 3.18  |
| (2R)-3-(Phosphonoxy)propane-1,2-<br>diyl diheptanoate | JAXUAGQDLYDLQ<br>B-GGYSOQFKNA-N     | 2 | 1.03  | Down | 0.88393070 | 1.06 | Up   | 0.74717121 | pos | [M+H] <sup>+</sup> | 397.1967 | 67.63 |
| Pipecolic acid                                        | HXEACLLIILLPRG-<br>UHFFFAOYNA-N     | 1 | 1.03  | Down | 0.89560337 | 1.70 | Up   | 0.21050538 | pos | [M+H] <sup>+</sup> | 130.0861 | 2.99  |
| Veratrosine                                           | WXQHVBNTINGJJR<br>-ZAFUCLPBNA-N     | 2 | 1.01  | Up   | 0.94704686 | 1.11 | Up   | 0.67099596 | pos | [M+H] <sup>+</sup> | 572.3614 | 48.52 |
| 3-Hydroxy-9-hexadecenoylcarnitine                     | WAGYLURELCUJJP<br>G-RPZXQYRRSA-N    | 2 | 1.01  | Up   | 0.94961092 | 1.04 | Up   | 0.58115810 | pos | [M+H] <sup>+</sup> | 414.3214 | 56.44 |
| 3-Cyclohexyl-1,1-bis(2-<br>methylpropyl)thiourea      | RQQYMIYZTDXXR<br>P-UHFFFAOYSA-N     | 2 | 1.03  | Up   | 0.95041497 | 1.50 | Up   | 0.26507870 | pos | [M+H] <sup>+</sup> | 271.2201 | 63.78 |
| PE(18:1(9Z)/20:4(5Z,8Z,11Z,14Z))                      | PECSWFQRRFRZP<br>W-BHPGJWMBSA-<br>N | 2 | 1.01  | Down | 0.96190425 | 1.07 | Down | 0.58985875 | pos | [M+H] <sup>+</sup> | 766.5307 | 54.59 |
| Heptaethylene glycol                                  | XPJRQAIZZQMSCM<br>-UHFFFAOYSA-N     | 2 | 1.00  | Down | 0.99950523 | 1.11 | Down | 0.62838470 | pos | [M+H] <sup>+</sup> | 327.2014 | 17.97 |
| 3-Methylindole                                        | ZFRKQXVRDFCRJ<br>G-UHFFFAOYSA-N     | 2 | 2.22  | Up   | 0.32027247 | 1.22 | Up   | 0.17802053 | neg | [M-H] <sup>-</sup> | 130.0674 | 12.66 |
| Avocadene 4-acetate                                   | MFLWBVVCOWPU<br>BA-UHFFFAOYNA-<br>N | 2 | 3.85  | Up   | 0.00000962 | 1.23 | Up   | 0.25921122 | neg | [M-H] <sup>-</sup> | 327.2556 | 40.89 |
| Canrenone                                             | UJVLDDZCTMKXJK<br>-WNHSNXHDSA-N     | 2 | 7.88  | Up   | 0.00000000 | 1.20 | Up   | 0.18696924 | neg | [M-H] <sup>-</sup> | 339.1997 | 39.91 |
| Caprylic acid                                         | WWZKQHOCKIZLM<br>A-UHFFFAOYSA-N     | 1 | 2.88  | Up   | 0.00032049 | 1.03 | Up   | 0.89523757 | neg | [M-H] <sup>-</sup> | 143.1070 | 19.41 |
| Cholesterol sulfate                                   | BHYOQNUELFTYR<br>T-ZMWIUTBPNA-N     | 2 | 16.88 | Up   | 0.00006077 | 1.16 | Down | 0.55328249 | neg | [M-H] <sup>-</sup> | 465.3039 | 42.56 |

|                                  |                                     |   |         |      |            |      |      |            |     |        |          |       |
|----------------------------------|-------------------------------------|---|---------|------|------------|------|------|------------|-----|--------|----------|-------|
| Docosahexaenoic acid             | MBMBGCFOFBJS<br>T-KUBAVDMBSA-N      | 1 | 4.41    | Down | 0.01025668 | 2.98 | Down | 0.01329273 | neg | [M-H]- | 327.2346 | 46.33 |
| Dodecanoic acid                  | POULHZVOKOAJM<br>A-UHFFFAOYSA-N     | 1 | 1.24    | Down | 0.40349789 | 1.06 | Down | 0.85001991 | neg | [M-H]- | 199.1695 | 37.98 |
| LysoPE(0:0/22:4(7Z,10Z,13Z,16Z)) | VLFJNHPNIOTOOA<br>-YMIVKDKMSA-N     | 2 | 10.93   | Up   | 0.00000027 | 1.23 | Up   | 0.22413570 | neg | [M-H]- | 528.3093 | 35.60 |
| LysoPE(18:0/0:0)                 | BBYWOYAFBUOUF<br>P-JOCHJYFZSA-N     | 1 | 10.67   | Up   | 0.00000087 | 1.09 | Up   | 0.62142070 | neg | [M-H]- | 480.3100 | 37.10 |
| LysoPE(18:1(9Z)/0:0)             | PYVVRVRFVLRNJLY<br>-MZMPXXGTSA-N    | 1 | 32.73   | Up   | 0.00000746 | 1.93 | Up   | 0.01602767 | neg | [M-H]- | 478.2931 | 37.54 |
| LysoPE(18:2(9Z,12Z)/0:0)         | DBHKHNGBVGWQJ<br>E-USWSLJGRSA-N     | 1 | 148.04  | Down | 0.00041488 | 2.16 | Down | 0.42241726 | neg | [M-H]- | 476.2814 | 35.10 |
| Methyl decanoate                 | YRHYCMZPEVDGF<br>Q-UHFFFAOYSA-N     | 2 | 7.56    | Up   | 0.00000256 | 1.12 | Up   | 0.35145249 | neg | [M-H]- | 185.1531 | 33.03 |
| Perillic acid                    | CDSMSBUVCWHO<br>RP-UHFFFAOYNA-<br>N | 1 | 1.20    | Down | 0.58934215 | 1.85 | Down | 0.00569642 | neg | [M-H]- | 165.0919 | 21.46 |
| Phomopsichalasin                 | AEKBQYOSHUYAC<br>R-HUBYWGRONA-<br>N | 2 | 1223.64 | Up   | 0.00026964 | 4.64 | Up   | 0.00528030 | neg | [M-H]- | 502.2980 | 36.61 |

---

**Table S2.** List of metabolic pathways as matched in MetaboAnalyst 3.0.

| Compound name                                       | # Hit of metabolites | -LOG(p) | Impact  |
|-----------------------------------------------------|----------------------|---------|---------|
| Caffeine metabolism                                 | 3                    | 5.312   | 0.27813 |
| Fatty acid biosynthesis                             | 3                    | 3.0119  |         |
| Glycolysis or Gluconeogenesis                       | 2                    | 2.3377  |         |
| Phenylalanine metabolism                            | 2                    | 1.728   | 0.17318 |
| Primary bile acid biosynthesis                      | 2                    | 1.6607  | 0.01029 |
| Starch and sucrose metabolism                       | 2                    | 1.5665  | 0.02968 |
| Linoleic acid metabolism                            | 1                    | 1.4794  |         |
| Pyrimidine metabolism                               | 2                    | 1.3005  | 0.03619 |
| Sphingolipid metabolism                             | 1                    | 1.0481  | 0.1402  |
| Aminoacyl-tRNA biosynthesis                         | 2                    | 1.001   |         |
| Phenylalanine, tyrosine and tryptophan biosynthesis | 1                    | 0.98684 | 0.00062 |
| alpha-Linolenic acid metabolism                     | 1                    | 0.93094 | 0.20335 |
| Pentose phosphate pathway                           | 1                    | 0.85568 |         |
| Pyruvate metabolism                                 | 1                    | 0.85568 | 0.13756 |
| Propanoate metabolism                               | 1                    | 0.78905 |         |
| Nitrogen metabolism                                 | 1                    | 0.71119 |         |
| Glycerophospholipid metabolism                      | 1                    | 0.71119 | 0.00317 |
| Galactose metabolism                                | 1                    | 0.67622 | 0.00276 |
| Steroid hormone biosynthesis                        | 2                    | 0.67576 | 0.01235 |
| Histidine metabolism                                | 1                    | 0.628   | 0.00861 |
| Pentose and glucuronate interconversions            | 1                    | 0.50794 | 0.009   |
| Cysteine and methionine metabolism                  | 1                    | 0.47451 | 0.03806 |
| Arachidonic acid metabolism                         | 1                    | 0.4154  | 0.21669 |
| Drug metabolism - cytochrome P450                   | 1                    | 0.2512  | 0.0044  |
| Amino sugar and nucleotide sugar metabolism         | 1                    | 0.24125 | 0.27813 |

**Table S3.** Summary of the clinical data of enrolled patients and controls.

| Subject ID | Disease | Active / Inactive | Score | Gender | Age at Blood Draw | Age at Diagnosis | Disease Duration (yrs) |
|------------|---------|-------------------|-------|--------|-------------------|------------------|------------------------|
| 113        | CD      | Active            | 17    | F      | 66                | 18               | 48                     |
| 114        | CD      | Active            | 10    | M      | 79                | 33               | 46                     |
| 115        | CD      | Active            | 10    | M      | 55                | 32               | 23                     |
| 129        | CD      | Active            | 11    | F      | 62                | 35               | 27                     |
| 139        | CD      | Active            | 14    | F      | 42                | 17               | 25                     |
| 148        | CD      | Active            | 10    | F      | 32                | 25               | 7                      |
| 156        | CD      | Active            | 13    | M      | 43                | 32               | 11                     |
| 157        | CD      | Active            | 11    | M      | 29                | 15               | 14                     |
| 158        | CD      | Active            | 12    | F      | 24                | 21               | 3                      |
| 159        | CD      | Active            | 21    | M      | 57                | 19               | 38                     |
| 141        | CD      | Inactive          | 0     | M      | 22                | 14               | 8                      |
| 143        | CD      | Inactive          | 0     | F      | 46                | 45               | 1                      |
| 145        | CD      | Inactive          | 0     | F      | 28                | 15               | 13                     |
| 146        | CD      | Inactive          | 0     | M      | 60                | 26               | 34                     |
| 147        | CD      | Inactive          | 0     | M      | 32                | 21               | 11                     |
| 149        | CD      | Inactive          | 0     | M      | 71                | 41               | 30                     |
| 150        | CD      | Inactive          | 0     | F      | 60                | 27               | 33                     |
| 151        | CD      | Inactive          | 0     | F      | 24                | 10               | 14                     |
| 152        | CD      | Inactive          | 0     | F      | 25                | 18               | 7                      |
| 153        | CD      | Inactive          | 0     | M      | 27                | 24               | 3                      |
| 104        | HC      | n/a               | n/a   | F      | 59                | n/a              | n/a                    |
| 106        | HC      | n/a               | n/a   | F      | 60                | n/a              | n/a                    |
| 107        | HC      | n/a               | n/a   | F      | 53                | n/a              | n/a                    |
| 110        | HC      | n/a               | n/a   | M      | 61                | n/a              | n/a                    |
| 111        | HC      | n/a               | n/a   | M      | 53                | n/a              | n/a                    |
| 116        | HC      | n/a               | n/a   | M      | 23                | n/a              | n/a                    |
| 117        | HC      | n/a               | n/a   | M      | 40                | n/a              | n/a                    |
| 118        | HC      | n/a               | n/a   | M      | 51                | n/a              | n/a                    |
| 119        | HC      | n/a               | n/a   | F      | 69                | n/a              | n/a                    |
| 120        | HC      | n/a               | n/a   | F      | 52                | n/a              | n/a                    |

## QA/QC Procedures of Metabolomic Analysis

QA/QC metabolomics practice include real-time mass calibration, intermittent injection of QC (pooled extracts), sample randomization and blank injection, which has been strictly applied to the present study. Three no-injections, one solvent blank injection, and one QC sample injection were performed before the analysis of the bulk test samples. QC samples were analyzed every 8 samples to evaluate potential batch effects. As validated, the whole procedure ensures that (1) chromatographic conditions are sufficiently equilibrated, (2) stable back pressure reached, and (3) batch effect monitoring covers all test samples.

## References

1. Fiehn O, Robertson D, Griffin J, van der Werf M, Nikolau B, Morrison N, Sumner LW, Goodacre R, Hardy NW, Taylor C *et al*: **The metabolomics standards initiative (MSI)**. *Metabolomics* 2007, **3**(3):175-178.
2. Blaženović I, Kind T, Ji J, Fiehn O: **Software Tools and Approaches for Compound Identification of LC-MS/MS Data in Metabolomics**. *Metabolites* 2018, **8**(2):31.
